# Supplementary material for: Topological polymorphism and temperature-driven topotactic transitions of metal–organic coordination polymers
Source: Royal Society of Chemistry journal article supplement (doi:10.1039/d0ce01045f), 2020-01-01
Supplement: d0ce01045f1.pdf [file d0ce01045f1.pdf]

## Topological polymorphism and temperature-driven topotactical transitions of metal-organic coordination polymers

Vadim A. Dubskikh,<sup>a</sup> Anna A. Lysova,<sup>\*a,b</sup> Denis G. Samsonenko,<sup>a,b</sup>

Danil N. Dybtsev,<sup>\*a,b</sup> Vladimir P. Fedin<sup>a,b</sup>

<sup>a</sup>Nikolaev Institute of Inorganic Chemistry, Siberian Branch of the Russian Academy of Sciences,  
3 Acad. Lavrentiev Ave., 630090, Novosibirsk, Russia

<sup>b</sup>Novosibirsk State University, 2 Pirogov Str., 630090, Novosibirsk, Russia

\*Corresponding authors: lysova@niic.nsc.ru; dan@niic.nsc.ru

Table S1. Crystal data and structure refinement for **1–2**.

| Compound/parameter                                  | <b>1</b>                                                                                      | <b>2</b>                                                                                      |
|-----------------------------------------------------|-----------------------------------------------------------------------------------------------|-----------------------------------------------------------------------------------------------|
| Empirical formula                                   | C <sub>45</sub> H <sub>47</sub> Mg <sub>3</sub> N <sub>5</sub> O <sub>17</sub> S <sub>6</sub> | C <sub>42</sub> H <sub>40</sub> Mg <sub>3</sub> N <sub>4</sub> O <sub>16</sub> S <sub>6</sub> |
| <i>M</i> , g/mol                                    | 1195.16                                                                                       | 1122.07                                                                                       |
| Crystal system                                      | <i>Triclinic</i>                                                                              | <i>Monoclinic</i>                                                                             |
| Space group                                         | <i>P</i> -1                                                                                   | <i>C2/c</i>                                                                                   |
| <i>a</i> , Å                                        | 9.7723(6)                                                                                     | 18.7842(6)                                                                                    |
| <i>b</i> , Å                                        | 12.8960(9)                                                                                    | 14.8469(4)                                                                                    |
| <i>c</i> , Å                                        | 13.7128(10)                                                                                   | 19.2101(5)                                                                                    |
| $\alpha$ , deg.                                     | 104.309(6)                                                                                    | 90                                                                                            |
| $\beta$ , deg.                                      | 109.946(6)                                                                                    | 104.519(3)                                                                                    |
| $\gamma$ , deg.                                     | 96.773(5)                                                                                     | 90                                                                                            |
| <i>V</i> , Å <sup>3</sup>                           | 1534.78(19)                                                                                   | 5186.4(3)                                                                                     |
| <i>Z</i>                                            | 1                                                                                             | 4                                                                                             |
| <i>D</i> (calc.), g/cm <sup>3</sup>                 | 1.293                                                                                         | 1.437                                                                                         |
| $\mu$ , mm <sup>-1</sup>                            | 0.318                                                                                         | 0.370                                                                                         |
| <i>F</i> (000)                                      | 620                                                                                           | 2320                                                                                          |
| Crystal size, mm                                    | 0.24 × 0.20 × 0.19                                                                            | 0.27 × 0.12 × 0.09                                                                            |
| $\theta$ range for data collection, deg.            | 2.27–25.68                                                                                    | 2.19–25.68                                                                                    |
| Index ranges                                        | -11 ≤ <i>h</i> ≤ 11, -15 ≤ <i>k</i> ≤ 15,<br>-16 ≤ <i>l</i> ≤ 16                              | -22 ≤ <i>h</i> ≤ 19, -18 ≤ <i>k</i> ≤ 14,<br>-23 ≤ <i>l</i> ≤ 19                              |
| Reflections collected / independent                 | 22815 / 5815                                                                                  | 11286 / 4921                                                                                  |
| <i>R</i> <sub>int</sub>                             | 0.0317                                                                                        | 0.0167                                                                                        |
| Reflections with <i>I</i> > 2σ( <i>I</i> )          | 5032                                                                                          | 4408                                                                                          |
| Goodness-of-fit on <i>F</i> <sup>2</sup>            | 1.088                                                                                         | 1.040                                                                                         |
| Final <i>R</i> indices [ <i>I</i> > 2σ( <i>I</i> )] | <i>R</i> <sub>1</sub> = 0.0602, <i>wR</i> <sub>2</sub> = 0.1816                               | <i>R</i> <sub>1</sub> = 0.0495, <i>wR</i> <sub>2</sub> = 0.1383                               |

|                                             |                                  |                                  |
|---------------------------------------------|----------------------------------|----------------------------------|
| <i>R</i> indices (all data)                 | $R_1 = 0.0683$ , $wR_2 = 0.1868$ | $R_1 = 0.0546$ , $wR_2 = 0.1415$ |
| Largest diff. peak / hole, $e/\text{\AA}^3$ | 1.114 / -0.532                   | 1.028 / -1.169                   |

---

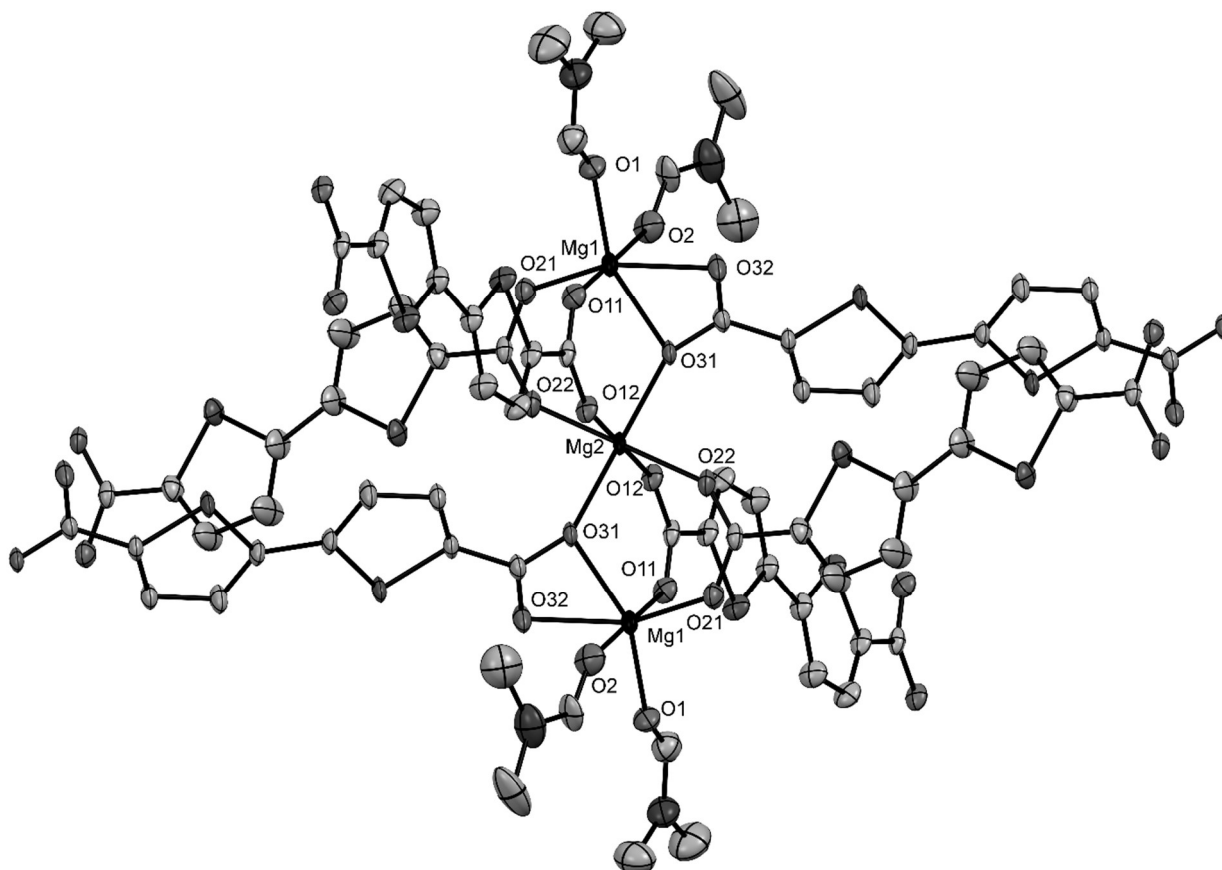

**Fig. S1.** Coordination environment of Mg(II) cations in **1**. Ellipsoids of 50% probability. Only one of possible orientation of coordinated DMF molecules is shown. Hydrogen atoms are not shown.

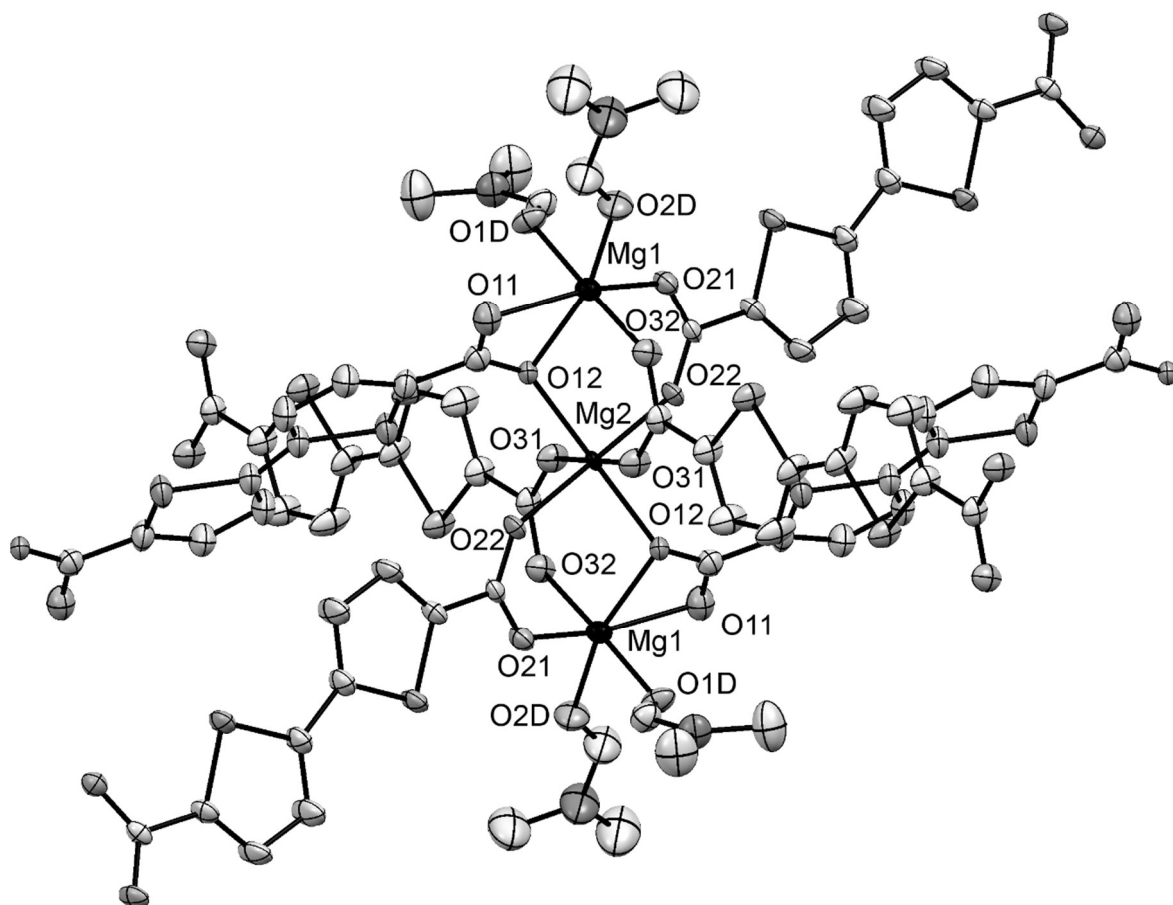

**Fig. S2.** Coordination environment of Mg(II) cations in **2**. Ellipsoids of 50% probability. Only one of possible orientation of coordinated DMF molecules is shown. Hydrogen atoms are not shown.

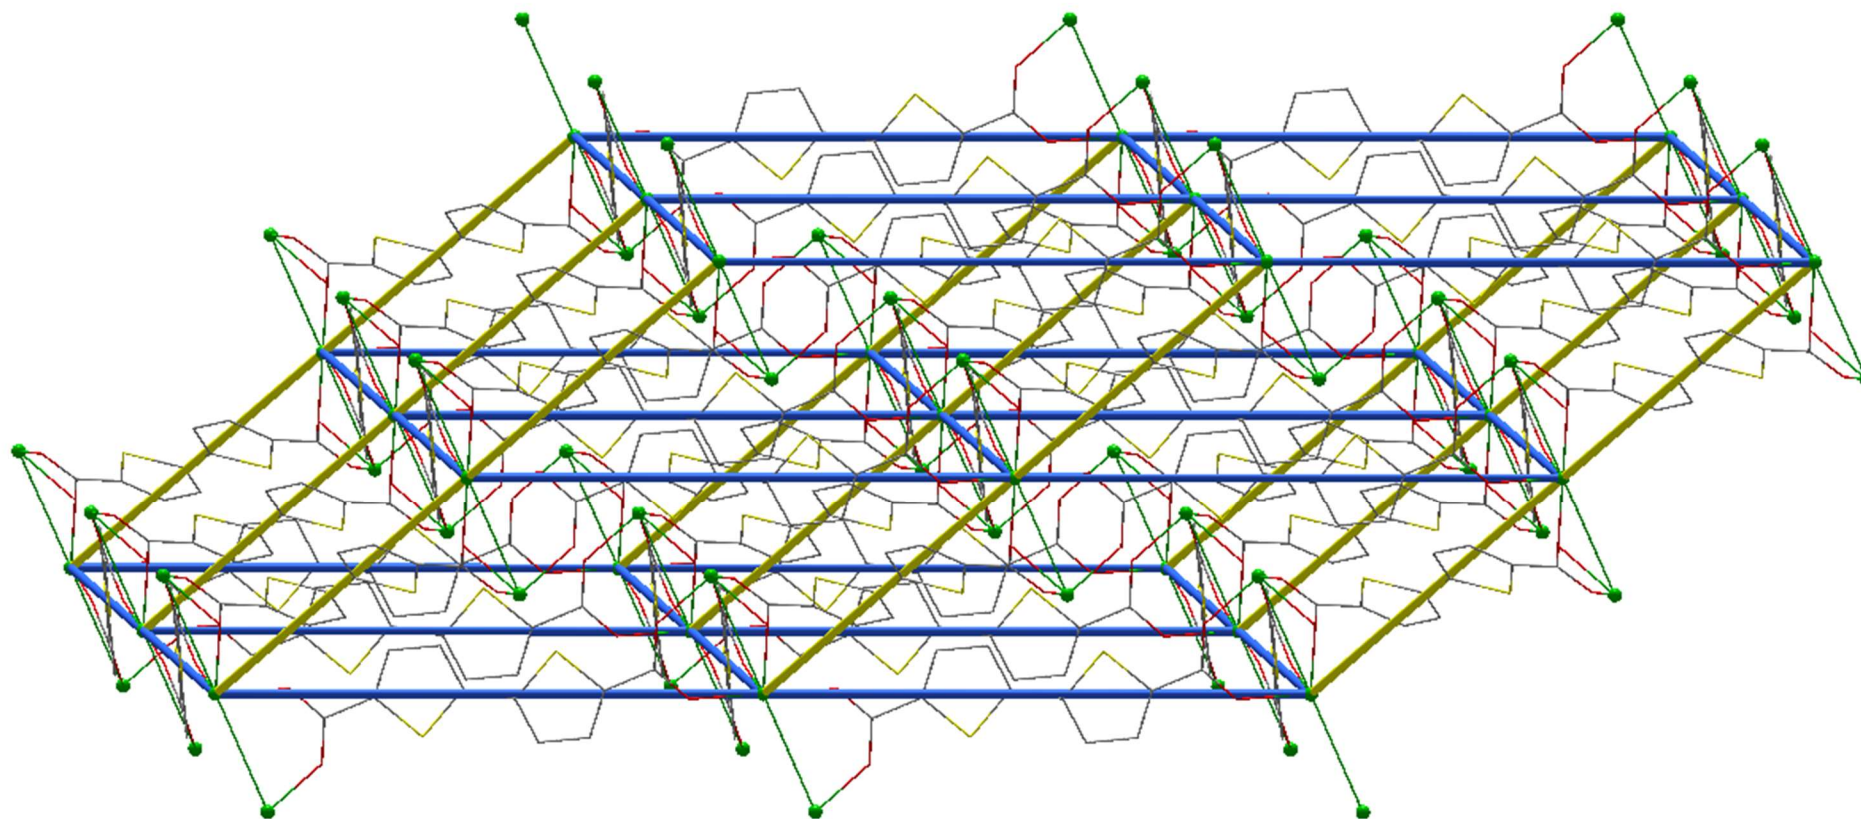

**Fig. S3.** Crystal structure **1**. Blue and yellow lines highlight **pcu** topology of the framework. The Mg atoms are connected to emphasize the  $\{\text{Mg}_3(\text{RCOO})_6\}$  building units. Solvent molecules and hydrogen atoms are omitted.

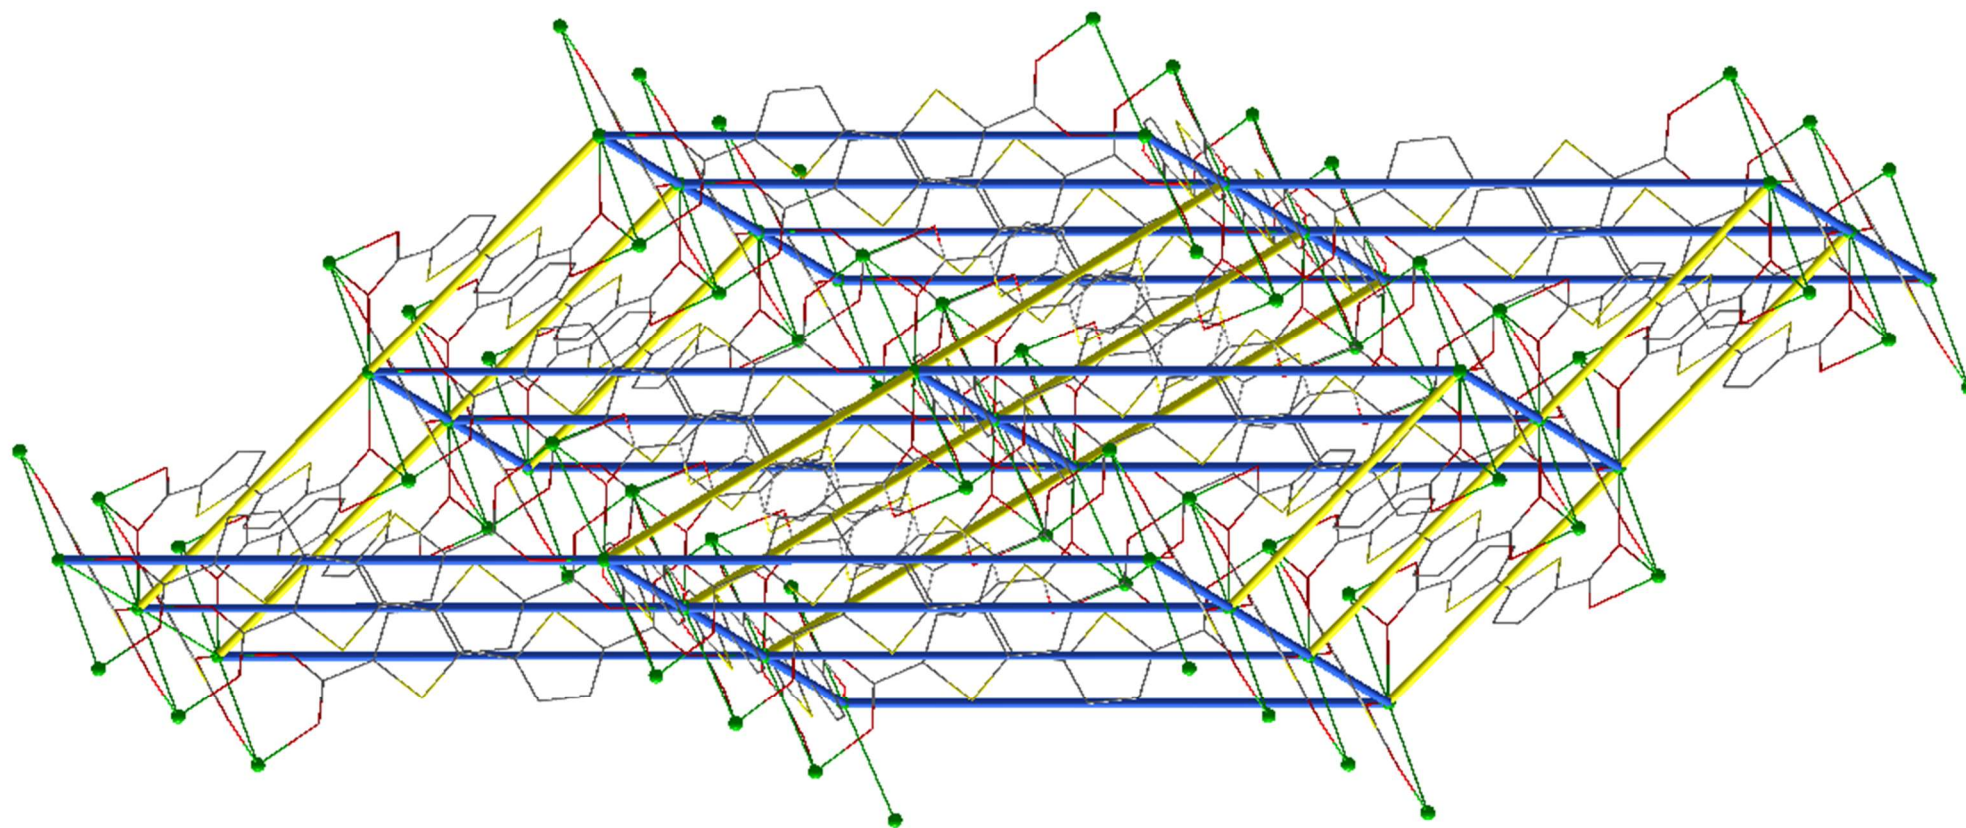

**Fig. S4.** Crystal structure **2**. Blue and yellow lines highlight **sxb** topology of the framework. The Mg atoms are connected to emphasize the  $\{\text{Mg}_3(\text{RCOO})_6\}$  building units. Solvent molecules and hydrogen atoms are omitted.

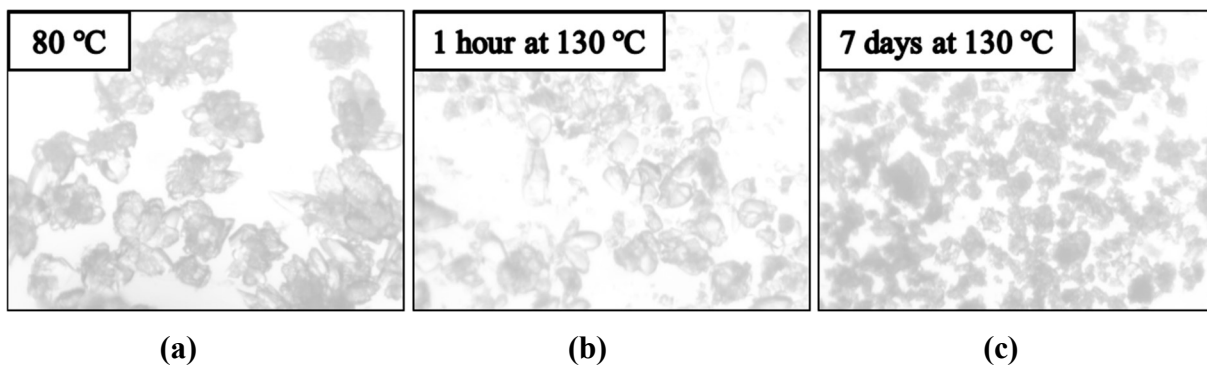

**Fig. S5.** Photographs of the product crystals of **1** formed at 80 °C (a), kept in mother liquor at 130 °C during 1 hour (b), and 7 days (c), indicating of the formation of the HT phase **2**.

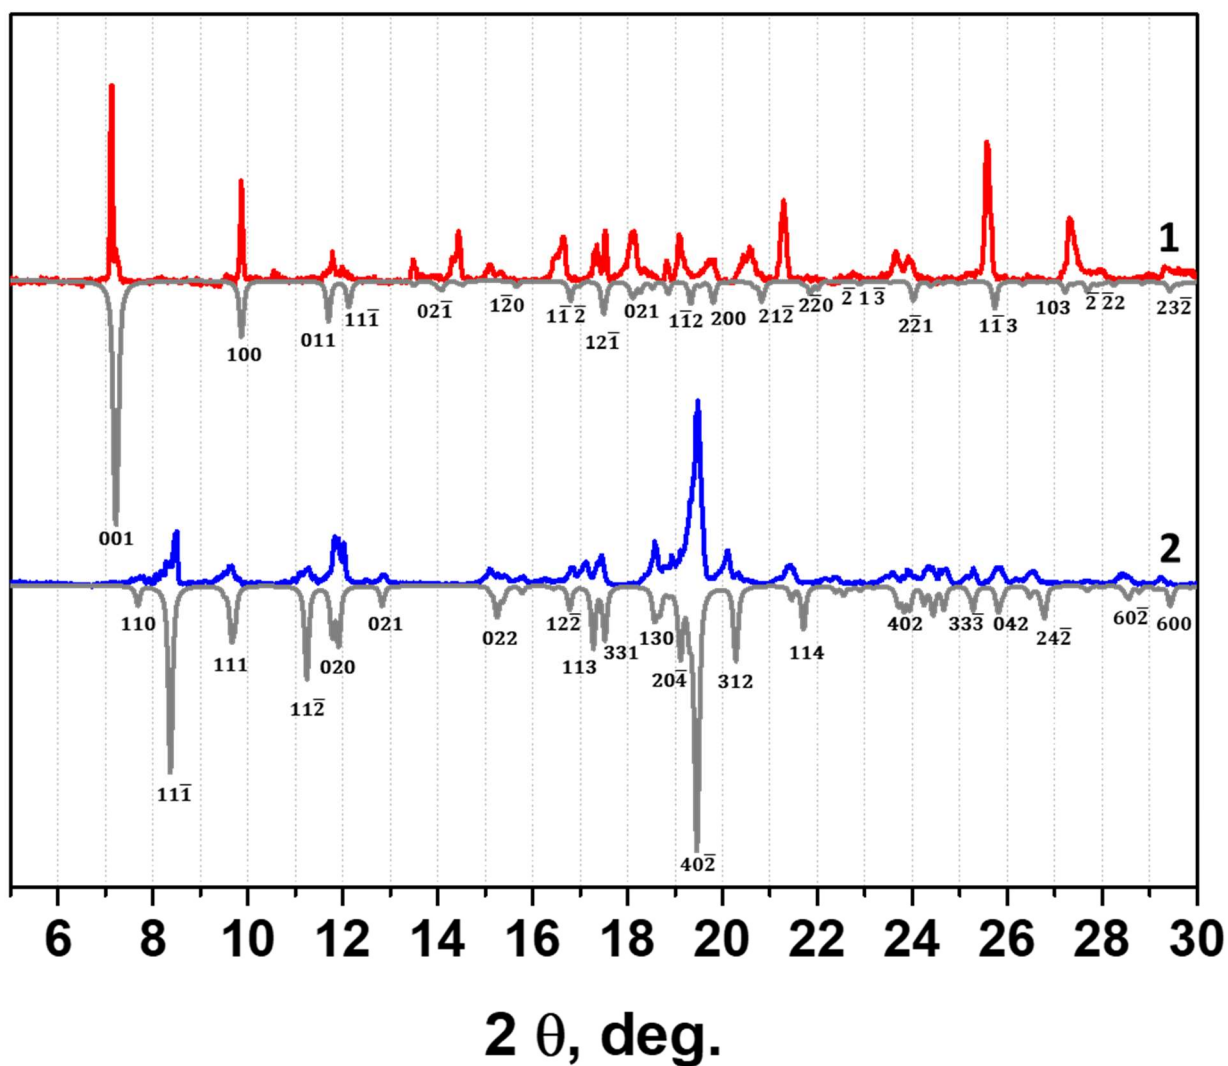

**Fig. S6.** Powder X-ray diffraction patterns for compounds **1** and **2** (practical – in color, theoretical – in grey) with indexes of the reflexes of both phases **1** and **2**.
